# Supplementary material
Source: publisher site journal article supplement (https://www.dovepress.com/article/411924)
Supplement: Supplementary file 1 [file get_supplementary_file.php]

**Supplementary Table 1:** Search Strategy used for PubMed Database for study on a systematic review of barriers to Access and Utilization of Adolescents Sexual and Reproductive Health Services in Sub-Saharan Africa, 2023.

| S.No | Focus | Search terms |
| --- | --- | --- |
| 1 | Population | *(((“Adolescent” [Mesh] OR adolescen* [tiab] OR teen*[tiab] OR youth*[tiab] OR young adult*[tiab] OR Young people [tiab] OR girl*[tiab] OR boy*[tiab] OR young woman[tiab] OR young man[tiab] OR young men[tiab] OR Young adult[Mesh])))* |
| 2 | Health services | *(((((((((((((((((((((((((((((((((((adolescent health services[MeSH Terms]) OR (reproductive health services[MeSH Terms])) OR (Contraception[MeSH Terms])) OR (Family Planning Services[MeSH Terms])) OR (pregnancy[MeSH Terms])) OR (Prenatal Care[MeSH Terms])) OR (Sexually Transmitted Diseases[MeSH Terms])) OR (hiv testing[MeSH Terms])) OR (delivery, obstetric[MeSH Terms])) OR (birth control[tiab])) OR (contracept*[tiab])) OR (family planning[tiab])) OR (contraceptive implant[tiab])) OR (long acting reversible contracept*[tiab])) OR (LARC[tiab])) OR (condom[tiab])) OR (condoms[tiab])) OR (cervical cap[tiab])) OR (vaginal ring[tiab])) OR (HIV[tiab])) OR (AIDS[tiab])) OR (sexually transmitted disease [tiab])) OR (STI*[tiab])) OR (STD*[tiab])) OR (sexually transmitted infection*[tiab])) OR (acquired immunodeficiency syndrome[tiab])) OR (abortion*[tiab])) OR (abstinen*[tiab])) OR (pregnant*[tiab])) OR (access to health service*[tiab])) OR (access to reproductive health services [tiab])) OR (access to sexual and reproductive health services[tiab])) OR (access friendly health services [tiab])) OR (deliveries[tiab])) OR (Abortion, Induced[MeSH Terms])) OR (Sexual Abstinence[MeSH Terms])* |
| 3 | Study design | *TI (qualitative OR interview* OR "focus group*" OR ((thematic* OR comparative*) N1 analy*) OR "lived experience*" OR "mixed method*" OR "grounded theory" OR phenomenolog* OR ethnograph*) OR AB (qualitative OR interview* OR "focus group*" OR ((thematic* OR comparative*) N1 analy*) OR "lived experience*" OR "mixed method*" OR "grounded theory" OR phenomenolog* OR ethnograph*) OR KW (qualitative OR interview* OR "focus group*" OR ((thematic* OR comparative*) N1 analy*) OR "lived experience*" OR "mixed method*" OR "grounded theory" OR phenomenolog* OR ethnograph*)* |
| 4 | Phenomena of interest | *TI (barrier* OR obstacle* OR challeng* OR hinder* OR hindrance* OR disincentiv* OR facilitat* OR enabl* OR incentiv* OR attitude* OR opinion* OR perspective* OR perception* OR perceive* OR view* OR belie* OR experience* OR knowledge OR understanding OR motivat* OR (factor* N1(influenc* OR impact* OR affect*))) OR AB (barrier* OR obstacle* OR challeng* OR hinder* OR hindrance* OR disincentiv* OR facilitat* OR enabl* OR incentiv* OR attitude* OR opinion* OR perspective* OR perception* OR perceive* OR view* OR belie* OR experience* OR knowledge OR*  *understanding OR motivat* OR (factor* N1 (influenc* OR impact* OR affect*))) OR KW (barrier* OR obstacle* OR challeng* OR hinder* OR hindrance* OR disincentiv* OR facilitat* OR enabl* OR incentiv* OR attitude* OR opinion* OR perspective* OR perception* OR perceive* OR view* OR belie* OR experience* OR knowledge OR understanding OR motivat* OR (factor* N1 (influenc*OR impact* OR affect*)))* |
| 4 | Setting  According to the World Bank | *((((((((((((((((((((((((((((((((((((((((sub-Saharan Africa) OR (Angola)) OR (Benin)) OR (Botswana)) OR (Burkina Faso)) OR (Burundi)) OR (Cameroon)) OR (Central African Republic)) OR (Chad)) OR (Congo)) OR (Cote d’Ivoire)) OR (Eritrea)) OR (Ethiopia)) OR (Gabon)) OR (Gambia)) OR (Ghana)) OR (Guinea)) OR (Guinea-Bissau)) OR (Kenya)) OR (Lesotho)) OR (Liberia)) OR (Madagascar)) OR (Malawi)) OR (Mali)) OR (Mauritania)) OR (Mauritius)) OR (Mozambique)) OR (Namibia)) OR (Niger)) OR (Nigeria)) OR (Rwanda)) OR (Senegal)) OR (Sierra Leone)) OR (Somalia)) OR (South Africa)) OR (United Republic of Tanzania)) OR (Togo)) OR (Uganda)) OR (Zaire)) OR (Zambia)) OR (Zimbabwe)* |
| 5 |  | #1 AND #2 AND #3 AND #4 |

Supplementary Table 2: Characteristics of the included studies for study on a systematic review of barriers to Access and Utilization of Adolescents Sexual and Reproductive Health Services in Sub-Saharan Africa, 2023.

| **ID** | **Author** | **Study aim** | **Country** | **Study design** | **Method of data collection** | **Sampling methods** | **Number of participants** | **Method of Data Analysis** |
| --- | --- | --- | --- | --- | --- | --- | --- | --- |
| **01** | [Hailemariam, Gutema et al. 2021](#_ENREF_5). [1](#_ENREF_1) | To explore the challenges faced by female out-of-school adolescents in accessing sexual and reproductive health services in the Bench-Sheko zone in Ethiopia. | Ethiopia | Qualitative | Eight focus group discussions and 8 in-depth interviews were conducted among female out-of-school adolescents, and health care professionals, respectively. | Purposive sampling technique | 72 | Thematic analysis using social–ecological model |
| **02** | [Munea et al., 2022](#_ENREF_1) [2](#_ENREF_2) | Therefore, this study explores whether the sociocultural norms influencing adolescent SRH behavior vary between youth-friendly service programs and non-Program areas in West Gojjam Zone, North West Ethiopia. | Ethiopia. | Qualitative | A total of 18 key informant interviews, twelve FGDs, and four in-depth interviews were conducted. | Purposive sampling technique | 112 | thematic analysis approach |
| **03** | [Abuosi and Anaba 2019](#_ENREF_2).  [3](#_ENREF_3). | This paper aims to explore perceived barriers to accessing and using adolescent  Health services in Ghana. | Ghana | Qualitative | Twenty-four interviews were conducted with adolescent respondents were interviewed. | Convenient sampling. | 24 | Thematic analysis was guided by Braun and Clarke’s (2006) Framework. |
| **04** | Amankwaa, Godfred et al.2018[4](#_ENREF_4) | This study aims to examine the level of SRH-related knowledge, service access, and use among school-going adolescents. | Ghana | Qualitative | 12 focus group discussions with in-school adolescents and 18 in-depth interviews with SRH service providers. | purposively and conveniently selected | 132 | A thematic analytical framework |
| **05** | Challa et al. 2018[5](#_ENREF_5). | Little is known about the multilevel social determinants of adolescent sexual and reproductive health (SRH) that shape the use of family planning (FP) among young women in Africa. | Ghana | Qualitative | In-depth interviews with 63 women aged 15–24 years in Accra and Kumasi, Ghana. | Purposive, stratified sampling | 63 | Grounded theory-guided thematic analysis |
| **06** | Chimatiro et al. 2020[6](#_ENREF_6). | The study aimed to discuss how each role can influence health-seeking behavior and improve SRH rights among adolescents from the local perspective | Malawi | Qualitative | 17 Key Informant ( 5 Traditional Authorities, 4 Village Headmen,  4 Religious leaders and4 Initiation Counselors) and 12 Focus  Group Discussions with community leaders. | Purposive sampling technique | **118** | Inductive thematic content analysis |
| **07** | Cohen et al. 2020[7](#_ENREF_7). | The purpose of this study was to gain insight into the behavioral barriers that prevent unmarried young people in eastern Senegal from using modern methods of contraception. | Senegal | Qualitative | 48 in-depth individual interviews with (26 young people aged 15–24) and (22 parents of youth) | Purposive sampling technique | **48** | thematic content analysis and synthesized the findings by major theme following the behavioral diagnosis methodology |
| **08** | Ahumuza et al. 2014[8](#_ENREF_8). | This study aimed to explore the challenges faced by PWPDs in accessing  sexual and reproductive health (SRH) services in Kampala, Uganda | Uganda | Qualitative | In-depth interviews with 40 PWPDs and key informant interviews with 10 PWPDs' representatives, staff of agencies supporting PWPDs, and health workers. | Purposive sampling technique | 50 | content thematic approach, which was guided by the Graneheim and Lundman framework |
| **09** | [McGranahan et al., 2021](#_ENREF_1)[9](#_ENREF_9) | We aimed to identify the underlying factors influencing the realization of sexual and reproductive health and rights for adolescent girls and young women living in Ugandan slums | Uganda | Qualitative | Ten in-depth  interviews were conducted with key informants; two focus groups were held with adolescent girls and young women  living in two slums in Uganda (21 participants in total); and three focus groups were held with community leaders,  Service providers, teachers, and parents (30 participants in total). | Purposive sampling technique | **61** | Thematically analyzed using simultaneous inductive and deductive approaches |
| **10** | [Mbeba, Mkuye et al. 2012](#_ENREF_9) [10](#_ENREF_10) | This study aimed at gaining insights into barriers to the utilization of SRHS in the Mtwara district. | Tanzania | Qualitative | A total of nine focus group discussions were conducted among girls (10-18 years), community leaders, and adults. Furthermore, facility assessment interviews among service providers were conducted in the 13 HFs to assess the suitability and capacity needs of the HFs to provide quality sexual reproductive health services. | Purposive sampling technique | not reported | Data was transcribed using pattern-matching methods then merged into relevant themes for analysis and interpretation |
| **11** | Nyblade Laura et al.2017[11](#_ENREF_11) | This study aims to explore the micro-level social process of stigma surrounding young people's sexual and reproductive health in two communities in Tanzania | Tanzania | Qualitative | Focus-group discussions (n = 22) In-depth interviews(n = 56) | a mix of purposive and snowball sampling. | 178 | Constant comparative techniques. |
| **12** | [Mohamed, Nmadu et al. 2020](#_ENREF_7).[12](#_ENREF_12) | This study explored the barriers hindering adolescents’ access to and utilization of RHS in primary healthcare centers | Nigeria | Qualitative | Fourteen in-depth interviews with adolescents and three key informant interviews with service providers were selected and interviewed. | Purposive sampling technique | 17 | Thematic analysis was guided by Braun and Clarke’s (2006) Framework. |
| **13** | [Ezenwaka, Mbachu et al. 2020](#_ENREF_4). [13](#_ENREF_13) | This paper presents findings from an in-depth exploration of  Perceived barriers to utilization of contraceptive services by adolescents. | Nigeria | Qualitative | Eighty-one in-depth  Interviews (31 were with policymakers /Program managers, 19with health workers, 8 with parents of adolescents,  17community leaders, and 6 religious leaders)and six focus group discussions with Village heads) (n=62) | Purposive sampling technique | 143 | Data were analyzed using a thematic framework approach, and the socio-ecological model was adapted for data synthesis. |
| **14** | Davids et al 2021[14](#_ENREF_14) | This study, therefore, aimed to explore the factors  that influenced decision-making about the sexual debut and condom use of adolescents from two schools in the Western  Cape | South Africa. | Qualitative | A sample of 16 adolescents was selected using purposive sampling | Purposive sampling technique | 16 | Thematic analysis was guided by Braun and Clarke’s (2006) Framework. |
| **15** | [Jonas et al., 2020](#_ENREF_1)[15](#_ENREF_15) | The aim of this research is to investigate perceptions of contraception services  among AGYW who had been recipients of a combination HIV-prevention intervention, to better understand factors  Affecting their access to and use of contraception services. | South Africa | Qualitative | Focus group discussions (FGDs) and in-depth interviews (IDIs) with  185 AGYW aged 15–24 years | one-on-one in-depth interviews | 185 | Using a socio-ecological model approach, |
| **16** | Schriver et al. 2014 [16](#_ENREF_16). | This paper aims to examine the knowledge and perceptions of current health services oriented toward young people  and examine potential alternative approaches to health service delivery. | South Africa | Qualitative | Twenty-five in-depth interviews with both recent users and non-users young people. | Purposive sampling | 25 | The collected data was analyzed according to the modified grounded theory. |
| **17** | [Gillespie et al., 2022](#_ENREF_1)[17](#_ENREF_17) | To gain insight into the complex picture of adolescents' access to SRH information and services in a peri-urban township | South Africa | Qualitative | Specific semi-structured interview guides were designed for each group of participants. | snowball sampling | 86 | In-depth inductive analysis |
| **18** | Silumbwe Adam et al.2018[18](#_ENREF_18) | This study aims to explore barriers and enablers to family planning and contraceptive services provision and utilization at community and health systems levels. | Zambia | Qualitative | Twelve focus group discussions were conducted with community members (n = 114) and two with healthcare  Providers (n = 19). Ten in-depth interviews were held with key stakeholders. | Purposive sampling | **133** | Thematic analysis |
| **19** | [Mwaisaka, Wado et al. 2021](#_ENREF_1)[19](#_ENREF_19) | This study was conducted to explore and compare adults’/parents’ and adolescent girls’ narratives and perspectives about contraception in Narok and Homa Bay counties,  Kenya. | Kenya | Qualitative | 45 in-depth-interviews conducted with purposively selected consenting adolescent  girls aged 15–19 | Purposive sampling | **41** | A “thematic analysis” approach |
| **20** | Mutea et al.2020[20](#_ENREF_20). | This study describes barriers to and facilitators of access to adolescent sexual and reproductive  Health services in Kisumu and Kakamega counties, Kenya. | Kenya | Qualitative | 113 participants were  Engaged in interviews (n=70 with adolescents), Community representatives (n = 12), Teachers (n = 14), HCWs (n = 10), and County Leaders (n = 7). | Purposive sampling | 113 | Both deductive and inductive analysis approaches follow the elements of the ecological framework |
| **21** | [Ochako et al., 2015](#_ENREF_1)[21](#_ENREF_21) | To inform a youth-focused behavior change communication campaign, Population Services Kenya developed a qualitative study to better understand these barriers among young women. | Kenya | Qualitative | In-depth interview | purposively selected | 34 | thematic coding framework |
| **22** | [Mukanga et al., 2023](#_ENREF_1)[22](#_ENREF_22) | The study aimed at exploring the multilevel factors influencing women’s choices and utilization of family planning services in Mufulira district of Zambia. | Zambia | Qualitative | two focus group discussions (n = 20) and in-depth interviews (n = 30) involving women of reproductive age were conducted in Mufulira district, Zambia | Maximum  variation | 50 | The content analysis approach following  Socio-ecological model components. |
| **23** | [Dioubaté et al., 2021](#_ENREF_1)[23](#_ENREF_23) | The objective of this study was to understand the barriers to the use of modern contraceptive methods among urban adolescents and youth (15–24 years) in Conakry, Guinea. | Guinea | Qualitative | Overall, 56 IDIs and 10 FGDs were conducted. | Maximum  variation | 136 | The data were analyzed using a mixed (inductive and deductive) thematic approach following the elements of the socio-ecological model. |

Supplementary Table 3: Quality assessment results of qualitative included studies using JBI critical appraisal checklist for study on a systematic review of barriers to Access and Utilization of Adolescents Sexual and Reproductive Health Services in Sub-Saharan Africa, 2023.

|  | **Quality assessment questions** | | | | | | | | | |  |
| --- | --- | --- | --- | --- | --- | --- | --- | --- | --- | --- | --- |
| Author[Year] | Is there congruity between the stated philosophical perspective and the research methodology? | Is there congruity between the research methodology and the research question or objectives? | Is there congruity between the research methodology and the methods used to collect data? | Is there congruity between the research methodology and the representation and analysis of data? | Is there congruity between the research methodology and the interpretation of results? | Is there a statement locating the researcher culturally or theoretically? | Is the influence of the researcher on the research, and vice- versa, addressed? | Are participants, and their voices, adequately represented? | Is the research ethical according to current criteria or, for recent studies, and is there evidence of ethical approval by an appropriate body? | Do the conclusions drawn in the research report flow from the analysis, or interpretation, of the data? | **Score** |
| [Hailemariam, Gutema et al. 2021](#_ENREF_5). [1](#_ENREF_1) | No | Yes | Yes | Yes | Yes | Yes | Yes | Yes | Yes | Yes | 9(high) |
| [Munea et al., 2022](#_ENREF_1) [2](#_ENREF_2) | No | Yes | Yes | Yes | Yes | Yes | Yes | Yes | Yes | Yes | 9(high) |
| [Abuosi and Anaba 2019](#_ENREF_2).  [3](#_ENREF_3). | No | Yes | Yes | Yes | Yes | Yes | No | Yes | Yes | Yes | 8(high) |
| Amankwaa, Godfred et al.2018[4](#_ENREF_4). | No | Yes | Yes | Yes | Yes | No | No | Yes | Yes | Yes | 7(moderate) |
| Challa et al. 2018[5](#_ENREF_5). | No | Yes | Yes | Yes | Yes | Yes | No | Yes | No | Yes | 7(moderate) |
| Chimatiro et al. 2020[6](#_ENREF_6). | No | Yes | Yes | Yes | Yes | No | Yes | Yes | Yes | Yes | 8(high) |
| Cohen et al. 2020[7](#_ENREF_7). | No | Yes | Yes | Yes | Yes | No | Yes | Yes | Yes | Yes | 8(high) |
| Ahumuza et al. 2014[8](#_ENREF_8). | No | Yes | Yes | Yes | Yes | No | No | Yes | Yes | Yes | 7(moderate) |
| [McGranahan et al., 2021](#_ENREF_1)[9](#_ENREF_9) | No | Yes | Yes | Yes | Yes | Yes | No | Yes | Yes | Yes | 8(high) |
| [Mbeba, Mkuye et al. 2012](#_ENREF_9) [10](#_ENREF_10). | No | Yes | Yes | Yes | Yes | No | No | Yes | No | Yes | 6(moderate) |
| Nyblade Laura et al.2017[11](#_ENREF_11) | No | Yes | Yes | Yes | Yes | Yes | Yes | No | Yes | Yes | 8(high) |
| [Mohamed, Nmadu et al. 2020](#_ENREF_7).[12](#_ENREF_12) | No | Yes | Yes | Yes | Yes | Yes | Yes | Yes | Yes | Yes | 9(high) |
| [Ezenwaka, Mbachu et al. 2020](#_ENREF_4)[13](#_ENREF_13). | No | Yes | Yes | Yes | Yes | Yes | Yes | Yes | Yes | Yes | 9(high) |
| Davids et al 2021[14](#_ENREF_14). | No | Yes | Yes | Yes | Yes | No | Yes | Yes | Yes | Yes | 8(high) |
| [Jonas et al., 2020](#_ENREF_1)[15](#_ENREF_15) | No | Yes | No | Yes | Yes | Yes | Yes | Yes | Yes | Yes | 8(high) |
| Schriver et al. 2014 [16](#_ENREF_16). | No | Yes | Yes | Yes | Yes | Yes | Yes | Yes | Yes | Yes | 9(high) |
| [Gillespie et al., 2022](#_ENREF_1)[17](#_ENREF_17) | Yes | Yes | Yes | Yes | Yes | Yes | No | No | Yes | Yes | 8(high) |
| Silumbwe Adam et al.2018[18](#_ENREF_18) | No | Yes | Yes | Yes | Yes | No | Yes | Yes | Yes | Yes | 8(high) |
| [Mwaisaka, Wado et al. 2021](#_ENREF_1)[19](#_ENREF_19) | No | Yes | Yes | Yes | Yes | Yes | Yes | Yes | Yes | Yes | 9(high) |
| Mutea et al.2020[20](#_ENREF_20). | No | Yes | Yes | Yes | Yes | No | Yes | No | Yes | Yes | 8(high) |
| Onokerhoraye et al.2017[21](#_ENREF_21) | No | Yes | Yes | Yes | Yes | No | Yes | No | Yes | Yes | 7(moderate) |
| [Mukanga et al., 2023](#_ENREF_1)[22](#_ENREF_22) | No | Yes | Yes | Yes | Yes | Yes | Yes | Yes | Yes | Yes | 9(high) |
| [Dioubaté et al., 2021](#_ENREF_1)[23](#_ENREF_23) | No | Yes | Yes | Yes | Yes | Yes | No | Yes | Yes | Yes | 8(high) |

**Note:** JBI critical appraisal checklist used with permission from Lockwood C, Munn Z, Porritt K. Qualitative research synthesis: methodological guidance for systematic reviewers utilizing meta-aggregation. Int J Evid Based Healthc. 2015 Sep;13(3):179-87.

Supplementary Table 4: The PRISMA 2020 statement for study on a systematic review of barriers to Access and Utilization of Adolescents Sexual and Reproductive Health Services in Sub-Saharan Africa, 2023.

| **Section and Topic** | **Item #** | **Checklist item** | **Location where item is reported** |
| --- | --- | --- | --- |
| **TITLE** | | |  |
| Title | 1 | Identify the report as a systematic review. | Pg. 1, (lines 1-3) |
| **ABSTRACT** | | |  |
| Abstract | 2 | See the PRISMA 2020 for Abstracts checklist. | Pg. 2, (lines 28-53) |
| **INTRODUCTION** | | |  |
| Rationale | 3 | Describe the rationale for the review in the context of existing knowledge. | Pg. 3-4, Background  (lines 56-93) |
| Objectives | 4 | Provide an explicit statement of the objective(s) or question(s) the review addresses. | Pg. 4, Background (lines 98-99) |
| **METHODS** | | |  |
| Eligibility criteria | 5 | Specify the inclusion and exclusion criteria for the review and how studies were grouped for the syntheses. | Pg. 4, Methods (line 107-115) |
| Information sources | 6 | Specify all databases, registers, websites, organisations, reference lists and other sources searched or consulted to identify studies. Specify the date when each source was last searched or consulted. | Pg. 4, Methods (line 101-105) |
| Search strategy | 7 | Present the full search strategies for all databases, registers and websites, including any filters and limits used. | Pg. 5, Methods (line 131-148) |
| Selection process | 8 | Specify the methods used to decide whether a study met the inclusion criteria of the review, including how many reviewers screened each record and each report retrieved, whether they worked independently, and if applicable, details of automation tools used in the process. | Pg. 6, Methods (line 150-158) |
| Data collection process | 9 | Specify the methods used to collect data from reports, including how many reviewers collected data from each report, whether they worked independently, any processes for obtaining or confirming data from study investigators, and if applicable, details of automation tools used in the process. | Pg. 6 Data abstraction and quality assessment **,**line 171-179 |
| Data items | 10a | List and define all outcomes for which data were sought. Specify whether all results that were compatible with each outcome domain in each study were sought (e.g. for all measures, time points, analyses), and if not, the methods used to decide which results to collect. |  |
| 10b | List and define all other variables for which data were sought (e.g. participant and intervention characteristics, funding sources). Describe any assumptions made about any missing or unclear information. | Pg. 5. Line 126-127 |
| Study risk of bias assessment | 11 | Specify the methods used to assess risk of bias in the included studies, including details of the tool(s) used, how many reviewers assessed each study and whether they worked independently, and if applicable, details of automation tools used in the process. | Pg.10 line 189-197 |
| Effect measures | 12 | Specify for each outcome the effect measure(s) (e.g. risk ratio, mean difference) used in the synthesis or presentation of results. | Not Applicable |
| Synthesis methods | 13a | Describe the processes used to decide which studies were eligible for each synthesis (e.g. tabulating the study intervention characteristics and comparing against the planned groups for each synthesis (item #5)). | Pg 7. Data analysis and synthesis (lines 180-193) |
| 13b | Describe any methods required to prepare the data for presentation or synthesis, such as handling of missing summary statistics, or data conversions. | Pg. 16, lines 457-475. |
| 13c | Describe any methods used to tabulate or visually display results of individual studies and syntheses. | Figure 1, and Figure 2 |
| 13d | Describe any methods used to synthesize results and provide a rationale for the choice(s). If meta-analysis was performed, describe the model(s), method(s) to identify the presence and extent of statistical heterogeneity, and software package(s) used. | Not Applicable |
| 13e | Describe any methods used to explore possible causes of heterogeneity among study results (e.g. subgroup analysis, meta-regression). | Not Applicable |
| 13f | Describe any sensitivity analyses conducted to assess robustness of the synthesized results. | Not Applicable |
| Reporting bias assessment | 14 | Describe any methods used to assess risk of bias due to missing results in a synthesis (arising from reporting biases). | Pg. 18; line 525-530. |
| Certainty assessment | 15 | Describe any methods used to assess certainty (or confidence) in the body of evidence for an outcome. | Not Applicable |
| **RESULTS** | | |  |
| Study selection | 16a | Describe the results of the search and selection process, from the number of records identified in the search to the number of studies included in the review, ideally using a flow diagram. | Figure 1. Pg.13 |
| 16b | Cite studies that might appear to meet the inclusion criteria, but which were excluded, and explain why they were excluded. | Pg 12.( lines 233-240) |
| Study characteristics | 17 | Cite each included study and present its characteristics. | Pg 7, line(203-209) Supportive material. |
| Risk of bias in studies | 18 | Present assessments of risk of bias for each included study. | Pg 18.(line 256-265) |
| Results of individual studies | 19 | For all outcomes, present, for each study: (a) summary statistics for each group (where appropriate) and (b) an effect estimate and its precision (e.g. confidence/credible interval), ideally using structured tables or plots. | Pg.7-16-, line(194-456) |
| Results of syntheses | 20a | For each synthesis, briefly summarise the characteristics and risk of bias among contributing studies. | Pg 14.(Table 1) |
| 20b | Present results of all statistical syntheses conducted. If meta-analysis was done, present for each the summary estimate and its precision (e.g. confidence/credible interval) and measures of statistical heterogeneity. If comparing groups, describe the direction of the effect. | Not Applicable |
| 20c | Present results of all investigations of possible causes of heterogeneity among study results. | Not Applicable |
| 20d | Present results of all sensitivity analyses conducted to assess the robustness of the synthesized results. | Not Applicable |
| Reporting biases | 21 | Present assessments of risk of bias due to missing results (arising from reporting biases) for each synthesis assessed. | Not Applicable |
| Certainty of evidence | 22 | Present assessments of certainty (or confidence) in the body of evidence for each outcome assessed. | Not Applicable |
| **DISCUSSION** | | |  |
| Discussion | 23a | Provide a general interpretation of the results in the context of other evidence. | Pg 17-18, Discussion (lines 480-524) |
| 23b | Discuss any limitations of the evidence included in the review. | Pg.18, line(525-544) |
| 23c | Discuss any limitations of the review processes used. | Pg.18, line(525-544) |
| 23d | Discuss implications of the results for practice, policy, and future research. | Pg 19, lne(546-569) |
| **OTHER INFORMATION** | | |  |
| Registration and protocol | 24a | Provide registration information for the review, including register name and registration number, or state that the review was not registered. | This study protocol was registered in the PROSPERO database (CRD42022259095). |
| 24b | Indicate where the review protocol can be accessed, or state that a protocol was not prepared. |  |
| 24c | Describe and explain any amendments to information provided at registration or in the protocol. |  |
| Support | 25 | Describe sources of financial or non-financial support for the review, and the role of the funders or sponsors in the review. | Pg 39, Funding (line 733) |
| Competing interests | 26 | Declare any competing interests of review authors. | Pg 39,(line 730-731) |
| Availability of data, code and other materials | 27 | Report which of the following are publicly available and where they can be found: template data collection forms; data extracted from included studies; data used for all analyses; analytic code; any other materials used in the review. | Pg 39,(line 734-735) |
